# Supplementary material for: Evaluation of the Microbiological Effectiveness of Three Accessible Mask Decontamination Methods and Their Impact on Filtration, Air Permeability and Physicochemical Properties
Source: MDPI journal article supplement (doi:10.3390/ijerph19116567), 2022-05-27
Supplement: s1 [file s1]

# **Supplementary Material**

## **Evaluation of the microbiological effectiveness of three accessible mask decontamination methods and their impact on filtration, air permeability and physicochemical properties**

**Roberta Lordelo<sup>1</sup>, José Rafael S. Botelho<sup>2</sup>, Paula V. Morais<sup>1</sup>, Hermínio C. de Sousa<sup>2</sup>, Rita Branco<sup>1</sup>, Ana M. A. Dias<sup>2</sup>, Marco S. Reis<sup>2,\*</sup>**

<sup>1</sup> University of Coimbra, CEMMPRE, Department of Mechanical Engineering,  
University of Coimbra, 3030-788 Coimbra, Portugal

<sup>2</sup> University of Coimbra, CIEPQPF, Department of Chemical Engineering, Rua Sílvio  
Lima, Pólo II – Pinhal de Marrocos, 3030-790 Coimbra, Portugal

*\* Corresponding author: [marco@eq.uc.pt](mailto:marco@eq.uc.pt)*

## S1. ATR-FTIR results

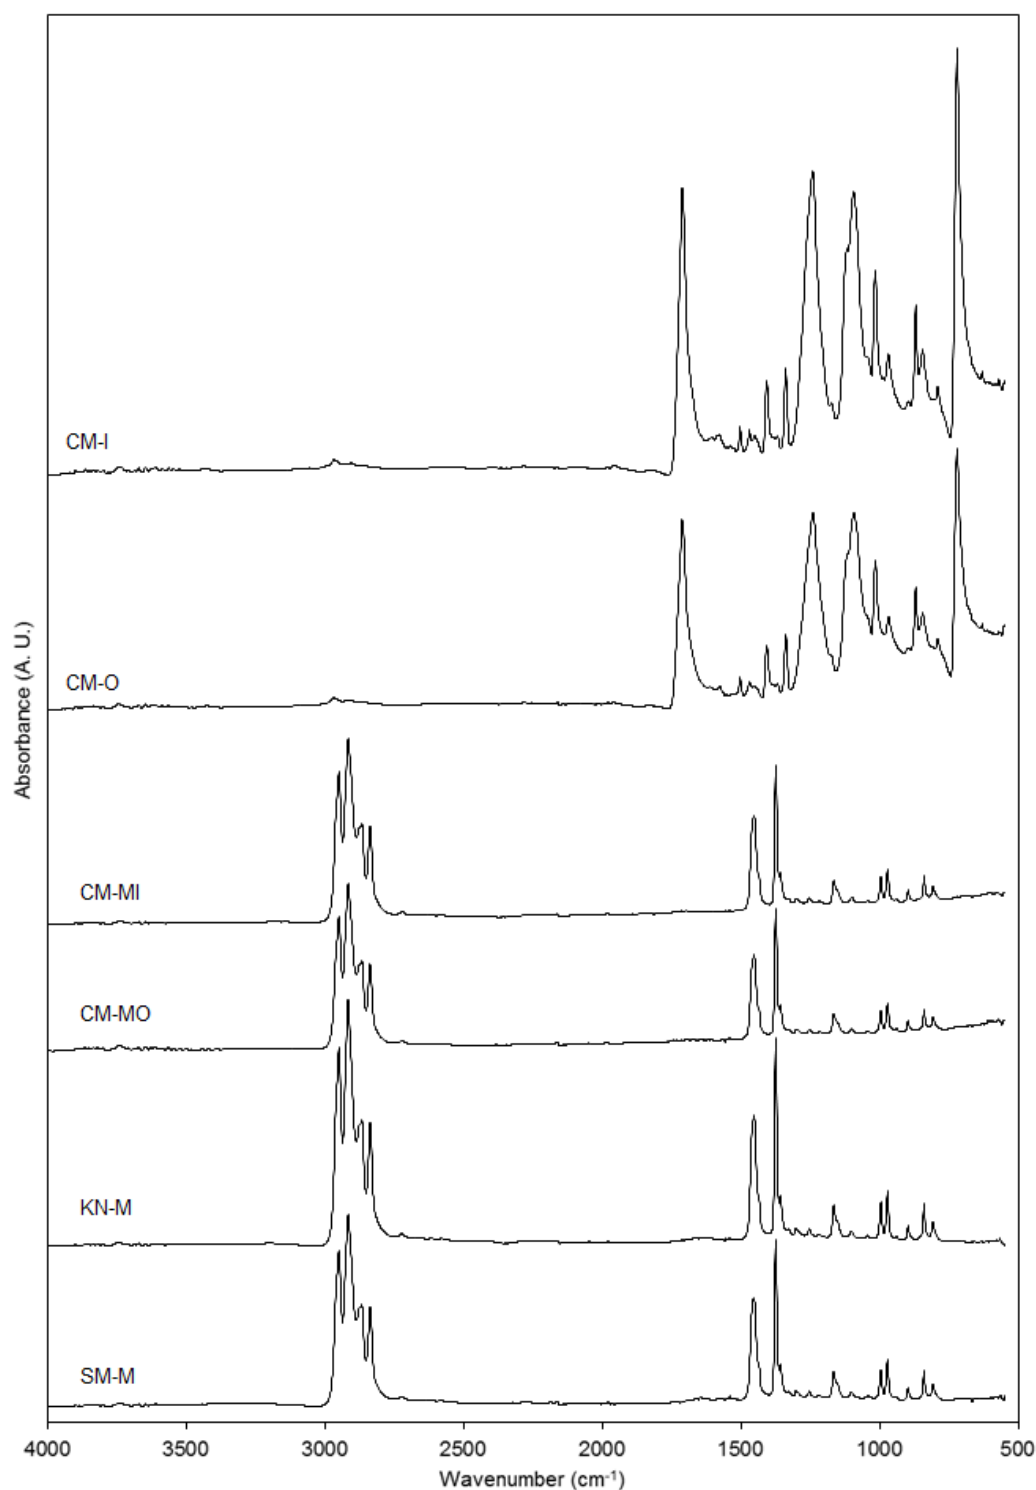

**Figure S1.** FTIR-ATR spectra of PP-based and PET-based constituent layers of non-processed RPD. SM, KN and CM correspond to surgical, KN95 and cloth face masks, respectively. In addition: O, I, M, MO and MI indicate the outer layer, the inner layer, the intermediate layer, the intermediate layer closest to the outer layer, and the intermediate layer closest to the inner layer, respectively.

**Table S1.** Observed wave number ranges of the bands assigned to poly(propylene) (PP) and poly(ethylene terephthalate) (PET) layers of all non-processed and processed RPD.

| PP                           |                                 | PET                           |                                 |
|------------------------------|---------------------------------|-------------------------------|---------------------------------|
| Peak assignment <sup>a</sup> | Wave number (cm <sup>-1</sup> ) | Peak assignment <sup>b</sup>  | Wave number (cm <sup>-1</sup> ) |
| C-C                          | 808-810                         | C-H                           | 722-723                         |
| C-H                          | 840-841                         | C-H                           | 871-872                         |
| CH <sub>3</sub>              | 972-973                         | C-H                           | 968-970                         |
| C-C                          |                                 | O=C-O-C                       | 1016-1017                       |
| CH <sub>3</sub>              | 996-999                         | O=C-O-C                       | 1092-1096                       |
| C-C                          | 1166-1169                       | C-O                           | 1240-1244                       |
| C-H                          |                                 | CH <sub>2</sub>               | 1339-1340                       |
| CH <sub>3</sub>              |                                 | C <sub>6</sub> H <sub>6</sub> | 1408-1409                       |
| CH <sub>3</sub>              | 1375-1376                       | C=O                           | 1711-1714                       |
| CH <sub>3</sub>              | 1452-1457                       |                               |                                 |
| CH <sub>3</sub>              | 2866-2869                       |                               |                                 |
| CH <sub>2</sub>              | 2917                            |                               |                                 |
| CH <sub>3</sub>              | 2949-2951                       |                               |                                 |

<sup>a</sup>Fang et al. (2012), ref. [1]

<sup>b</sup>Silva et al. (2012) , ref. [2]

## S2. Contact angle measurements

**Table S2.** Static water contact angle results of non-processed and processed RPD layers (10 cycles) and statistical analysis. SM, KN and CM correspond to surgical, KN95 and cloth face masks, respectively. O, I, M, MO and MI indicate the outer layer, the inner layer, the intermediate layer, the intermediate layer closest to the outer layer, and the intermediate layer closest to the inner layer, respectively. Average values and standard deviations are presented. Statistical significances are also indicated (one-way analysis with the Wilcoxon/Kruskal-Wallis test).

| RPD | Layer | Contact angle (°) |                               |           |           | <i>p</i> -value               |        |           |
|-----|-------|-------------------|-------------------------------|-----------|-----------|-------------------------------|--------|-----------|
|     |       | Control           | H <sub>2</sub> O <sub>2</sub> | NaClO     | Steam bag | H <sub>2</sub> O <sub>2</sub> | NaClO  | Steam bag |
| SM  | O     | 122.6±0.7         | 124.3±3.4                     | 124.8±1.1 | 126.4±1.1 | 0.751                         | 0.143  | 0.970     |
|     | I     | 126.6±0.9         | 129.4±1.1                     | 123.9±2.1 | 127.1±1.4 | 0.048*                        | 0.205  | 0.097     |
|     | M     | 126.6±1.3         | 126.0±1.0                     | 124.2±6.4 | 137.2±2.5 | 0.970                         | 0.267  | 0.003*    |
| KN  | O     | 115.4±0.7         | 107.3±3.6                     | 111.1±2.1 | 107.1±2.5 | 0.108                         | 0.011* | 0.028*    |
|     | I     | 140.5±9.9         | 112.4±2.7                     | 113.1±0.2 | 122.4±0.9 | 0.002*                        | 0.003* | 0.002*    |
|     | M     | 151.3±1.3         | 134.8±0.3                     | 139.1±2.1 | 150.0±6.8 | 0.005*                        | 0.050* | 0.038*    |
| CM  | O     | 132.9±1.1         | 136.5±2.5                     | 142.4±0.9 | 146.3±4.1 | 0.331                         | 0.057  | 0.005*    |
|     | MO    | 129.2±6.0         | 129.3±5.5                     | 124.4±1.0 | 142.5±7.1 | 0.895                         | 0.386  | 0.011*    |
|     | MI    | 126.0±1.6         | 125.3±4.1                     | 133.2±2.2 | 133.0±0.8 | 0.154                         | 0.004* | 0.013*    |

\*Statistical significance is considered when *p*-value < 0.05 (Wilcoxon/Kruskal-Wallis test, based on a  $\chi^2$  distribution with degrees of freedom equal to the number of levels of contact angle results minus one).

Note: it was not possible to determine water contact angles for the inner layer of CM masks due to the observed rapid water absorption/leakage through PET fabric.

### S3. Water vapor transmission rate (WVTR)

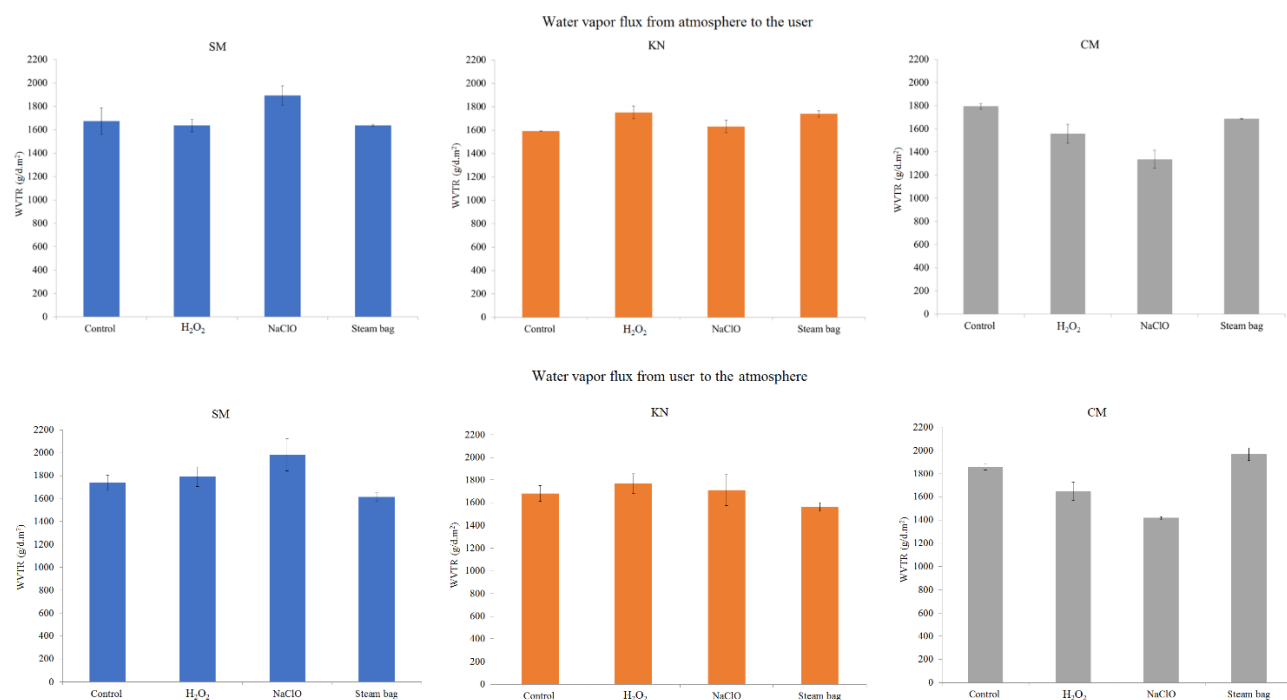

**Figure S2.** WVTR results (from 0-24 hours) for non-processed and processed RPD (10 cycles). SM, KN and CM correspond to surgical, KN95 and cloth face masks, respectively. Experiments were carried out for water vapor flux from the atmosphere to the user (above), and for water vapor flux from the user to the atmosphere (below). In the WVTR units, d stands for 1 day = 24 hours.

**Table S3** WVTR results of non-processed and processed RPD (10 cycles). SM, KN and CM correspond to surgical, KN95 and cloth masks, respectively. O, I, M, MO and MI indicate the outer layer, the inner layer, the intermediate layer, the intermediate layer closest to the outer layer, and the intermediate layer closest to the inner layer, respectively. Average values and standard deviations are presented. Statistical significances are also indicated (one-way analysis with the Wilcoxon/Kruskal-Wallis test).

| Flux direction          | RPD | Cycle # | WVTR (g/d.m <sup>2</sup> )    |          |           | <i>p</i> -value               |       |           |
|-------------------------|-----|---------|-------------------------------|----------|-----------|-------------------------------|-------|-----------|
|                         |     |         | H <sub>2</sub> O <sub>2</sub> | NaClO    | Steam bag | H <sub>2</sub> O <sub>2</sub> | NaClO | Steam bag |
| From atmosphere to user | SM  | 0       | 1676±108                      | 1676±108 | 1676±108  | 0.320                         | 0.123 | 0.156     |
|                         |     | 5       | 1753±55                       | 1831±0   | 1811±14   |                               |       |           |
|                         |     | 10      | 1636±55                       | 1889±83  | 1818±9    |                               |       |           |
|                         | KN  | 0       | 1597±0                        | 1597±0   | 1597±0    | 0.091                         | 0.123 | 0.095     |
|                         |     | 5       | 1596±0                        | 1694±28  | 1799±21   |                               |       |           |
|                         |     | 10      | 1752±55                       | 1635±55  | 1921±32   |                               |       |           |
|                         | CM  | 0       | 1811±28                       | 1811±28  | 1811±28   | 0.165                         | 0.102 | 0.156     |
|                         |     | 5       | 1792±0                        | 1558±165 | 1839±32   |                               |       |           |
|                         |     | 10      | 1577±83                       | 1344±83  | 1873±5    |                               |       |           |
| From user to atmosphere | SM  | 0       | 1739±69                       | 1739±69  | 1739±69   | 0.651                         | 0.156 | 0.156     |
|                         |     | 5       | 1694±138                      | 1889±83  | 1643±26   |                               |       |           |
|                         |     | 10      | 1791±88                       | 1983±139 | 1614±36   |                               |       |           |
|                         | KN  | 0       | 1679±7                        | 1679±7   | 1679±7    | 0.180                         | 0.156 | 0.102     |
|                         |     | 5       | 1655±83                       | 1636±55  | 1590±10   |                               |       |           |
|                         |     | 10      | 1770±55                       | 1710±23  | 1562±18   |                               |       |           |
|                         | CM  | 0       | 1860±27                       | 1860±27  | 1860±27   | 0.156                         | 0.180 | 0.102     |
|                         |     | 5       | 1714±110                      | 1422±28  | 1475±45   |                               |       |           |
|                         |     | 10      | 1646±78                       | 1419±11  | 1969±55   |                               |       |           |

Statistical significance is considered when *p*-value < 0.05 (Wilcoxon/Kruskal-Wallis test, based on a  $\chi^2$  distribution with degrees of freedom equal to the number of levels of contact angle results minus one).

Note: In WVTR units, d stands for 1 day = 24 hours

#### S4. Thermogravimetric analysis (TGA)

**Table S4.** Onset degradation temperatures and ashes/residual masses of non-processed RPD layers. SM, KN and CM correspond to surgical, KN95 and cloth masks, respectively. O, I, M, MO and MI indicate the outer layer, the inner layer, the intermediate layer, the intermediate layer closest to the outer layer, and the intermediate layer closest to the inner layer, respectively. Average values and standard deviations are presented.

| RPD | Layer | T <sub>onset</sub> (°C) | Residual mass (%) |
|-----|-------|-------------------------|-------------------|
| SM  | O     | 437.9±3.2               | 0.7±0.3           |
|     | I     | 437.9±0.9               | 0.4±0.1           |
|     | M     | 438.6±0.2               | 0.9±0.1           |
| KN  | O     | 438.6±0.8               | 0.8±0.0           |
|     | I     | 437.8±0.2               | 1.0±0.2           |
|     | M     | 372.0±0.0               | 0.1±0.3           |
| CM  | O     | 403.2±6.0               | 15.7±0.0          |
|     | I     | 403.2±0.2               | 16.3±1.4          |
|     | MO    | 437.4±0.4               | 0.4±0.3           |
|     | MI    | 436.6±0.2               | 0.8±0.1           |

## S5. Modulated Differential scanning calorimetry (MDSC)

**Table S5.** Melting ( $T_m$ ) and crystallization temperatures ( $T_c$ ) of non-processed and processed (10 cycles) RPD layers. SM, KN and CM correspond to surgical, KN95 and cloth masks, respectively. O, I, M, MO and MI indicate the outer layer, the inner layer, the intermediate layer, the intermediate layer closest to the outer layer, and the intermediate layer closest to the inner layer, respectively. Average values and standard deviations are presented.

| PP layers |       |                                  |            | PET layers |       |                                 |            |            |
|-----------|-------|----------------------------------|------------|------------|-------|---------------------------------|------------|------------|
| RPD       | Cycle | Layer-Treatment                  | $T_m$ (°C) | RPD        | Cycle | Layer-Treatment                 | $T_m$ (°C) | $T_c$ (°C) |
| SM        | 0     | O                                | 164.1±0.5  | CM         | 0     | O                               | 251.3±1.1  | 184.9±0.5  |
|           | 10    | O-H <sub>2</sub> O <sub>2</sub>  | 163.9±0.2  |            | 10    | O-H <sub>2</sub> O <sub>2</sub> | 252.3±0.3  | 184.6±1.1  |
|           | 10    | O-NaClO                          | 162.9±0.2  |            | 10    | O-NaClO                         | 252.1±0.6  | 205.6±1.1  |
|           | 10    | O-Steam bag                      | 163.4±0.5  |            | 10    | O-Steam bag                     | 252.3±0.3  | 184.5±1.4  |
|           | 0     | I                                | 163.1±1.0  |            | 0     | I                               | 251.9±0.9  | 193.4±1.1  |
|           | 10    | I-H <sub>2</sub> O <sub>2</sub>  | 162.9±0.2  |            | 10    | I-H <sub>2</sub> O <sub>2</sub> | 251.9±0.9  | 190.1±1.6  |
|           | 10    | I-NaClO                          | 163.9±0.7  |            | 10    | I-NaClO                         | 251.6±1.2  | 209.6±4.3  |
|           | 10    | I-Steam bag                      | 164.6±0.7  |            | 10    | I-Steam bag                     | 252.7±0.2  | 190.9±0.5  |
|           | 0     | M                                | 164.3±0.2  |            |       |                                 |            |            |
|           | 10    | M-H <sub>2</sub> O <sub>2</sub>  | 164.3±0.1  |            |       |                                 |            |            |
|           | 10    | M-NaClO                          | 164.5±0.4  |            |       |                                 |            |            |
|           | 10    | M-Steam bag                      | 163.8±0.9  |            |       |                                 |            |            |
| KN        | 0     | O                                | 167.3±0.5  |            |       |                                 |            |            |
|           | 10    | O-H <sub>2</sub> O <sub>2</sub>  | 166.9±0.8  |            |       |                                 |            |            |
|           | 10    | O-NaClO                          | 166.7±0.3  |            |       |                                 |            |            |
|           | 10    | O-Steam bag                      | 167.4±0.1  |            |       |                                 |            |            |
|           | 0     | I                                | 166.4±0.6  |            |       |                                 |            |            |
|           | 10    | I-H <sub>2</sub> O <sub>2</sub>  | 166.7±1.1  |            |       |                                 |            |            |
|           | 10    | I-NaClO                          | 166.3±0.2  |            |       |                                 |            |            |
|           | 10    | I-Steam bag                      | 166.6±0.2  |            |       |                                 |            |            |
|           | 0     | M                                | 164.1±0.0  |            |       |                                 |            |            |
|           | 10    | M-H <sub>2</sub> O <sub>2</sub>  | 164.5±0.7  |            |       |                                 |            |            |
|           | 10    | M-NaClO                          | 164.5±0.2  |            |       |                                 |            |            |
|           | 10    | M-Steam bag                      | 165.3±0.9  |            |       |                                 |            |            |
| CM        | 0     | MO                               | 163.1±0.5  |            |       |                                 |            |            |
|           | 10    | MO-H <sub>2</sub> O <sub>2</sub> | 162.7±0.5  |            |       |                                 |            |            |
|           | 10    | MO-NaClO                         | 163.8±0.7  |            |       |                                 |            |            |
|           | 10    | MO-Steam bag                     | 162.4±0.9  |            |       |                                 |            |            |
|           | 0     | MI                               | 162.5±0.7  |            |       |                                 |            |            |
|           | 10    | MI-H <sub>2</sub> O <sub>2</sub> | 162.4±0.7  |            |       |                                 |            |            |
|           | 10    | MI-NaClO                         | 163.9±0.7  |            |       |                                 |            |            |
|           | 10    | MI-Steam bag                     | 162.6±0.9  |            |       |                                 |            |            |



**Table S6.** Statistical analysis on DSC (melting and crystallization temperatures) and mercury intrusion porosimetry (% porosity) results for non-processed and processed RPD (10 cycles). SM, KN and CM correspond to surgical, KN95 and cloth masks, respectively. O, I, M, MO and MI indicate the outer layer, the inner layer, the intermediate layer, the intermediate layer closest to the outer layer, and the intermediate layer closest to the inner layer, respectively. Statistical significances are also indicated (one-way analysis using the Wilcoxon/Kruskal-Wallis test).

| Technique/Property                                   | RPD            | Layer       | <i>p</i> -value               |       |           |
|------------------------------------------------------|----------------|-------------|-------------------------------|-------|-----------|
|                                                      |                |             | H <sub>2</sub> O <sub>2</sub> | NaClO | Steam bag |
| <b>DSC</b>                                           | T <sub>m</sub> | SM          | O                             | 0.683 | 0.121     |
|                                                      |                |             | I                             | 0.439 | 0.121     |
|                                                      |                |             | M                             | 0.439 | 0.683     |
|                                                      |                | KN          | O                             | 0.439 | 1.000     |
|                                                      |                |             | I                             | 1.000 | 0.683     |
|                                                      |                |             | M                             | 0.121 | 0.121     |
|                                                      |                | CM          | O                             | 0.221 | 0.221     |
|                                                      |                |             | MO                            | 0.439 | 0.439     |
|                                                      |                |             | MI                            | 0.683 | 0.683     |
|                                                      |                |             | I                             | 0.439 | 0.1213    |
|                                                      |                | CM          | O                             | 1.000 | 1.000     |
|                                                      |                |             | I                             | 0.121 | 0.121     |
| <b>Mercury intrusion porosimetry</b><br>Porosity (%) | SM<br>KN<br>CM | Full device | 0.439                         | 0.439 | 1.000     |
|                                                      |                | Full device | 1.000                         | 0.121 | 1.000     |
|                                                      |                | Full device | 0.439                         | 0.121 | 1.000     |
|                                                      |                | Full device | 0.439                         | 0.121 | 1.000     |

Statistical significance is considered when *p*-value < 0.05 (Wilcoxon/Kruskal-Wallis test, based on a  $\chi^2$  distribution with degrees of freedom equal to the number of levels of contact angle results minus one).

## S6. Mercury intrusion porosimetry (MIP)

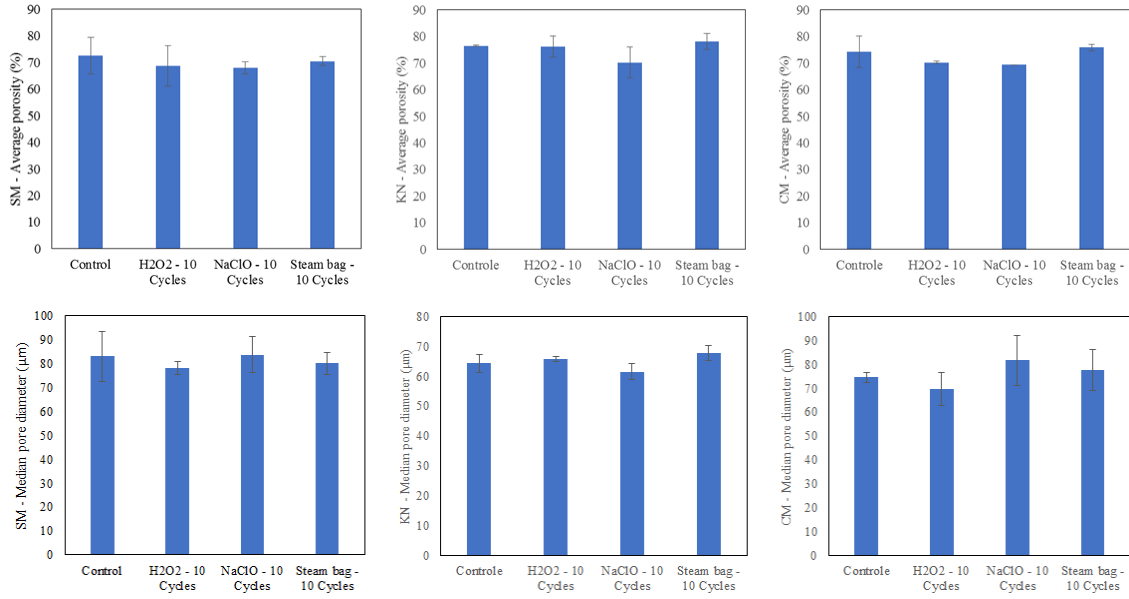

**Figure S3.** Porosities (%) and median pore sizes for non-processed and processed RPD (10 cycles) determined by mercury intrusion porosimetry. SM, KN and CM correspond to surgical (left), KN95 (middle) and cloth (right) face masks, respectively.

**Table S7.** Porosities (%) and median pore diameters for non-processed and processed RPD (10 cycles) determined by mercury intrusion porosimetry. SM, KN and CM correspond to surgical (left), KN95 (middle) and cloth (right) masks, respectively. Average values and standard deviations are presented.

| RPD | Cycle | Treatment                     | Porosity (%) | Median pore size (μm) |
|-----|-------|-------------------------------|--------------|-----------------------|
| SM  | 0     | Control                       | 73±7         | 83±11                 |
|     | 10    | H <sub>2</sub> O <sub>2</sub> | 69±8         | 78±3                  |
|     | 10    | NaClO                         | 68±2         | 84±8                  |
|     | 10    | Steam bag                     | 70±2         | 80±5                  |
| KN  | 0     | Control                       | 77±0         | 64±3                  |
|     | 10    | H <sub>2</sub> O <sub>2</sub> | 76±4         | 66±1                  |
|     | 10    | NaClO                         | 70±6         | 62±3                  |
|     | 10    | Steam bag                     | 78±3         | 68±2                  |
| CM  | 0     | Control                       | 74±6         | 75±2                  |
|     | 10    | H <sub>2</sub> O <sub>2</sub> | 70±0         | 70±7                  |
|     | 10    | NaClO                         | 69±0         | 82±10                 |
|     | 10    | Steam bag                     | 76±1         | 78±9                  |

## S7. Optical and Electronic Microscopy

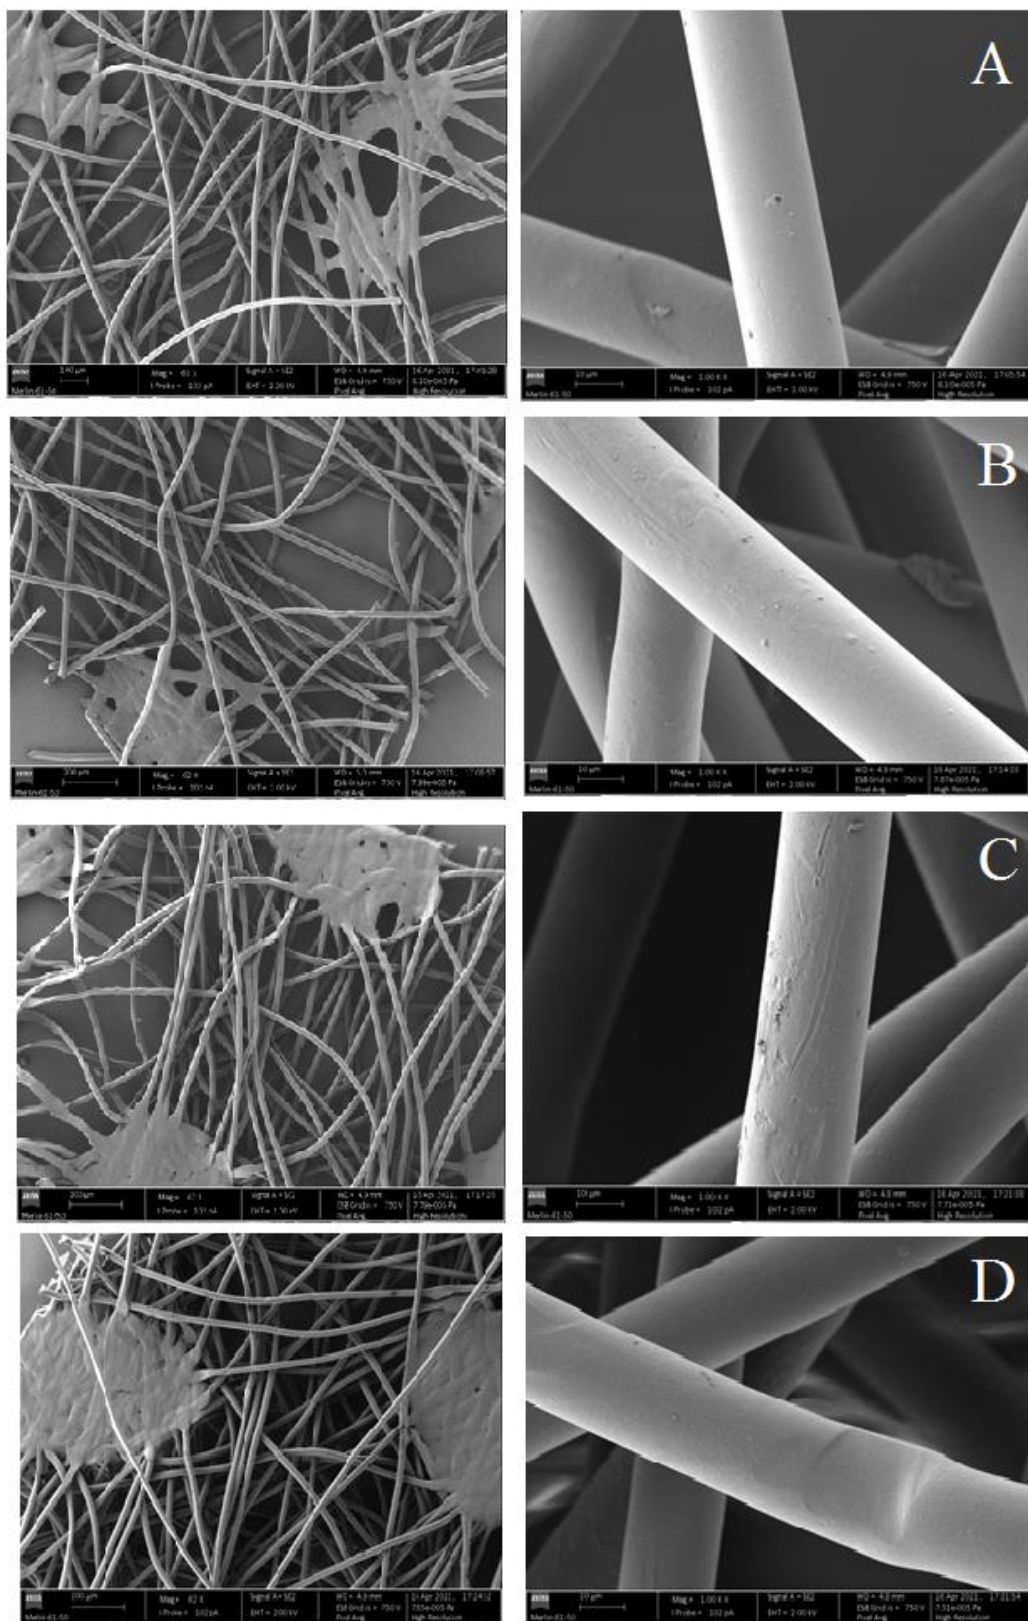

**Figure S4.** SEM images for surgical masks (SM). Left: bar corresponds to 200 μm. Right: bar corresponds to 10 μm. masks. (A) Control/non-processed; (B) 10 cycles H<sub>2</sub>O<sub>2</sub>; (C) 10 cycles NaClO; (D) 10 cycles Steam bag.

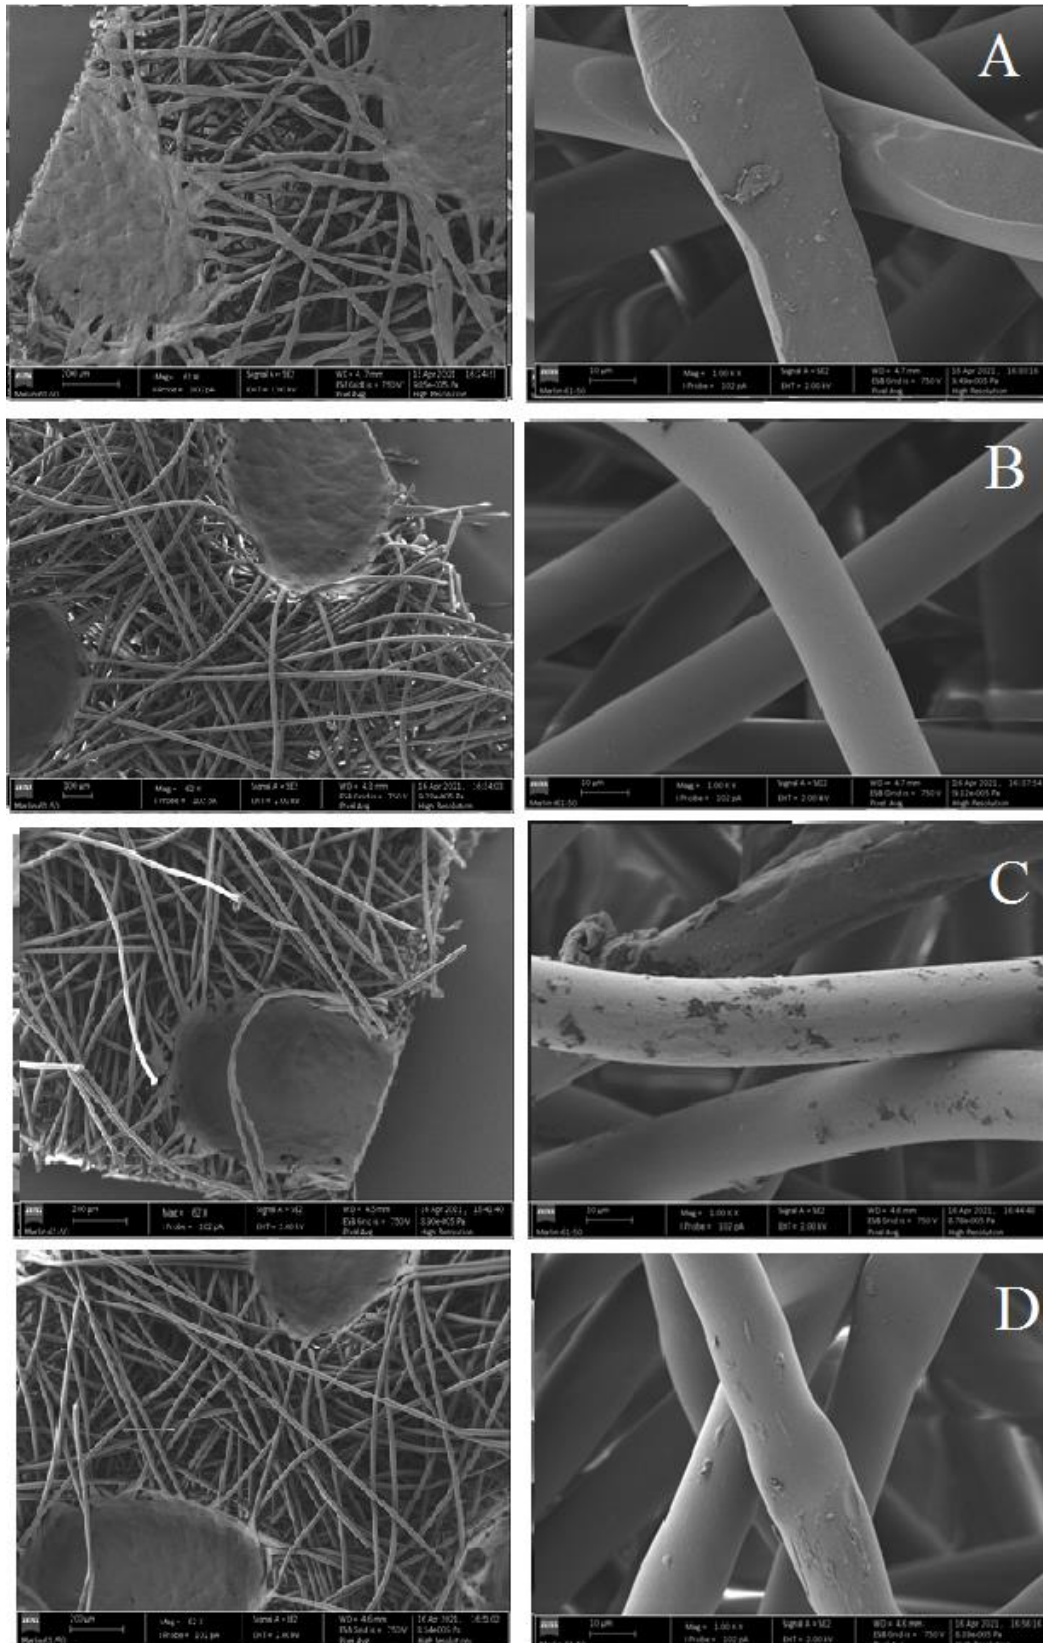

**Figure S5.** SEM images for KN95 masks (KN). Left: bar corresponds to 200 μm. Right: bar corresponds to 10 μm. masks. (A) Control/non-processed; (B) 10 cycles H<sub>2</sub>O<sub>2</sub>; (C) 10 cycles NaClO; (D) 10 cycles Steam bag.



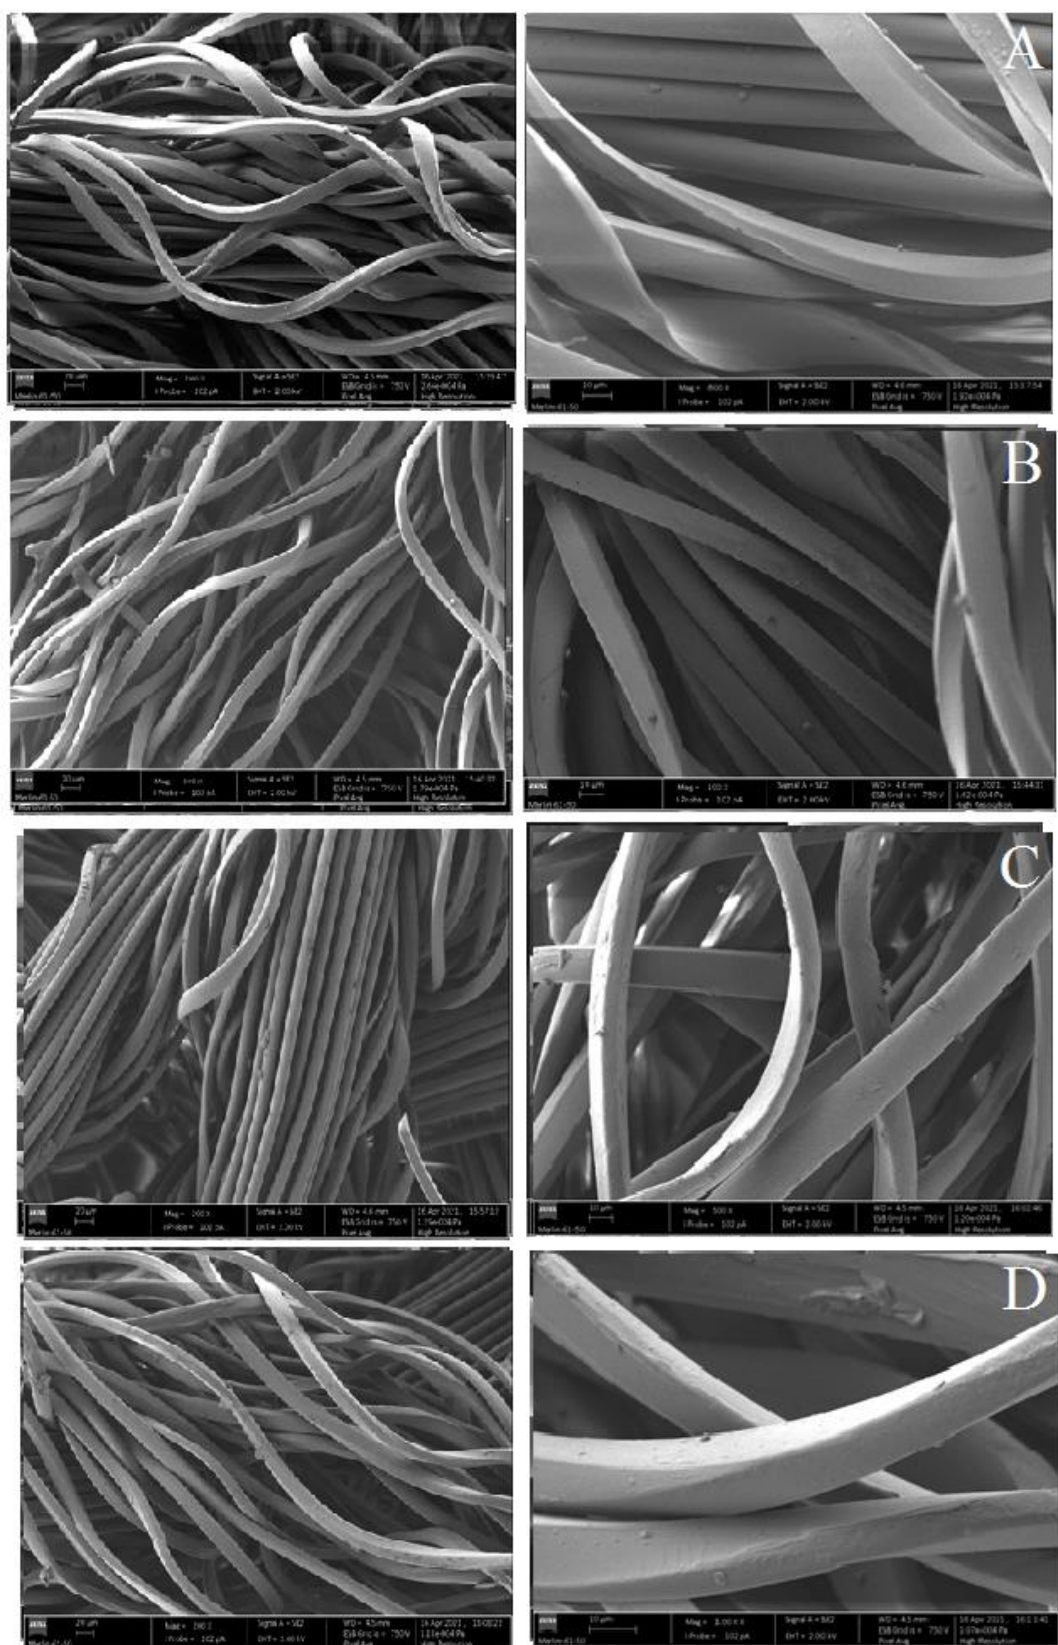

**Figure S6.** SEM images for cloth masks (CM). Left: bar corresponds to 200 μm. Right: bar corresponds to 10 μm. masks. (a) Control/non-processed; (B) 10 cycles H<sub>2</sub>O<sub>2</sub>; (C) 10 cycles NaClO; (D) 10 cycles Steam bag.

## References

1. Fang, J.; Zhang, L.; Sutton, D.; Wang, X.; Lin, T. Needleless melt-electrospinning of polypropylene nanofibres. *Journal of Nanomaterials* **2012**, 2012, 382639.
2. da Silva, R.C.L.; Alves, C.; Nascimento, J.H.; Neves, J.R.O.; Teixeira, V. Surface modification of polyester fabric by non-thermal plasma treatment. *Journal of Physics: Conference Series* **2012**, 406, 012017.
3. Elnagar, K.; Abou Elmaaty, T.; Raouf, S. Dyeing of polyester and polyamide synthetic fabrics with natural dyes using ecofriendly technique. *Journal of Textiles* **2014**, 2014, 363079.
